# Supplementary material for: Alternative splicing of basic chitinase gene PR3b in the low-nicotine mutants of Nicotiana tabacum L. cv. Burley 21
Source: PubMed Central journal article supplement (PMC5066497; doi:10.1093/jxb/erw345), 2016-09-23
Supplement: supp_erw345_supplementary_figures_S1_S5.pdf [file supp_erw345_supplementary_figures_S1_S5.pdf]

## Supplementary Figures

```

Genomic sequence 1 atgagcattaagctatctttacttttcaatctaccaaatattcttgctctcctaaccagcaaatagtagaagctggagatactgtggtctattggggccaagatgtaggagaaggtaaa
CDS sequence 1 atgagcattaagctatctttacttttcaatctaccaaatattcttgctctcctaaccagcaaatagtagaagctggagatactgtggtctattggggccaagatgtaggagaaggtaaa

Genomic sequence 121 ttgattgacacatgcaactctgggtctctacaaaattgtcaacattgoccttttatctctcttttggcaatttccaaactcctaaacttaacttagctggccattgtgaaccatctctgggt
CDS sequence 121 ttgattgacacatgcaactctgggtctctacaaaattgtcaacattgoccttttatctctcttttggcaatttccaaactcctaaacttaacttagctggccattgtgaaccatctctgggt

Genomic sequence 241 agttgccaacagttgacaacacagcattagacattgtcaaaagcataggaattaaaatcatgctctccattggaggttcaactcctacacacattatcctcagttgatgctaggcaa
CDS sequence 241 agttgccaacagttgacaacacagcattagacattgtcaaaagcataggaattaaaatcatgctctccattggaggttcaactcctacacacattatcctcagttgatgctaggcaa

Genomic sequence 361 gttgctgattacctatggaacaattttctcggcgccaatcatcttttaggccacttgagatgctgtgcttagatggcatagattttgacattgaacttggccaaccgattatattgca
CDS sequence 361 gttgctgattacctatggaacaattttctcggcgccaatcatcttttaggccacttgagatgctgtgcttagatggcatagattttgacattgaacttggccaaccgattatattgca

Genomic sequence 481 cttgccaagaggctttcagaacatggccaacaaggtagtcaaacagacgtttttataaagccgaacagagtggaaccaggatttgaacatatagttcaaatattctgattctttta
CDS sequence 481 cttgccaagaggctttcagaacatggccaaca-----

Genomic sequence 601 agttaataatttggcacaattcaataacttttaagacaaaacagagtttggcaciaaagttaactgggttcagccgaaccocatcccaaagggttagctccgcccctgaagccaaagga
CDS sequence -----

Genomic sequence 721 tggatatcatgatgtgtttagaataaccaagaattgcagatgccatgtaaaccaagcacaagaataaattgtaatttgggtgttgaataggttgaaggggagcctttcgtgaactg
CDS sequence -----

Genomic sequence 841 gtaagttattttcactgactagtagggtcatgaattcgagccttggaaatagcctcttgaataatgcaaggtgagactgtatacaatagatccttgggttgcacccttctactccgc
CDS sequence -----

Genomic sequence 961 gcatttagcgggagcttaatgcaccagttgtcttttttggttgttgaatgcaacatttgggtcagtggaagtacagaacacctgatgctattgggttaattagacgaacatcactgg
CDS sequence -----

Genomic sequence 1081 tttgagccttgcacagagatatttggtaattaaagttggaagaaggttaaagggcgagttcaaacactgtgagccaactgggtcgggccaagcagcaggaatttctcgggaaga
CDS sequence -----

Genomic sequence 1201 aatgttctctgatataaaacttggcactaactaatatcgtgccagaagcccagagggtattctccaacataaaatgaaaatgtcattaacatcaattctagattttcaagccattaga
CDS sequence -----

Genomic sequence 1321 gtggcaaaactcattctcttattatgcttttgaccggtaaaaaataacttaactgcagcaccacaatgtccttttccgtataaactcttaacggtgattacaaaactggcttattt
CDS sequence 514 -----ggtaaaaaataacttaactgcagcaccacaatgtccttttccgtataaactcttaacggtgattacaaaactggcttattt

Genomic sequence 1441 gactatgtttgggtccaattttacaacaatcccagtgcgagtttatgagcaattcagaaaatttcaagaggagtggaatcagtggaacatcaatccctgcaaaagaattgtatattgga
CDS sequence 598 gactatgtttgggtccaattttacaacaatcccagtgcgagtttatgagcaattcagaaaatttcaagaggagtggaatcagtggaacatcaatccctgcaaaagaattgtatattgga

Genomic sequence 1561 cttccagcagccaagcagccgggtagtggtatattccaagcaagtgtcaatgtcacaagttttaccatttctaaagggatcttcaagatgagaggtgcatgctttggaataga
CDS sequence 718 cttccagcagccaagcagccgggtagtggtatattccaagcaagtgtcaatgtcacaagttttaccatttctaaagggatcttcaagatgagaggtgcatgctttggaataga

Genomic sequence 1681 aaatttgatgttcaaagtggtctatagctctgctatcaggggtgctgttaa
CDS sequence 838 aaatttgatgttcaaagtggtctatagctctgctatcaggggtgctgttaa

```

**Fig. S1.** Alignment of *PR3b* genomic sequence and CDS (coding sequence) amplified from tobacco Burley 21.



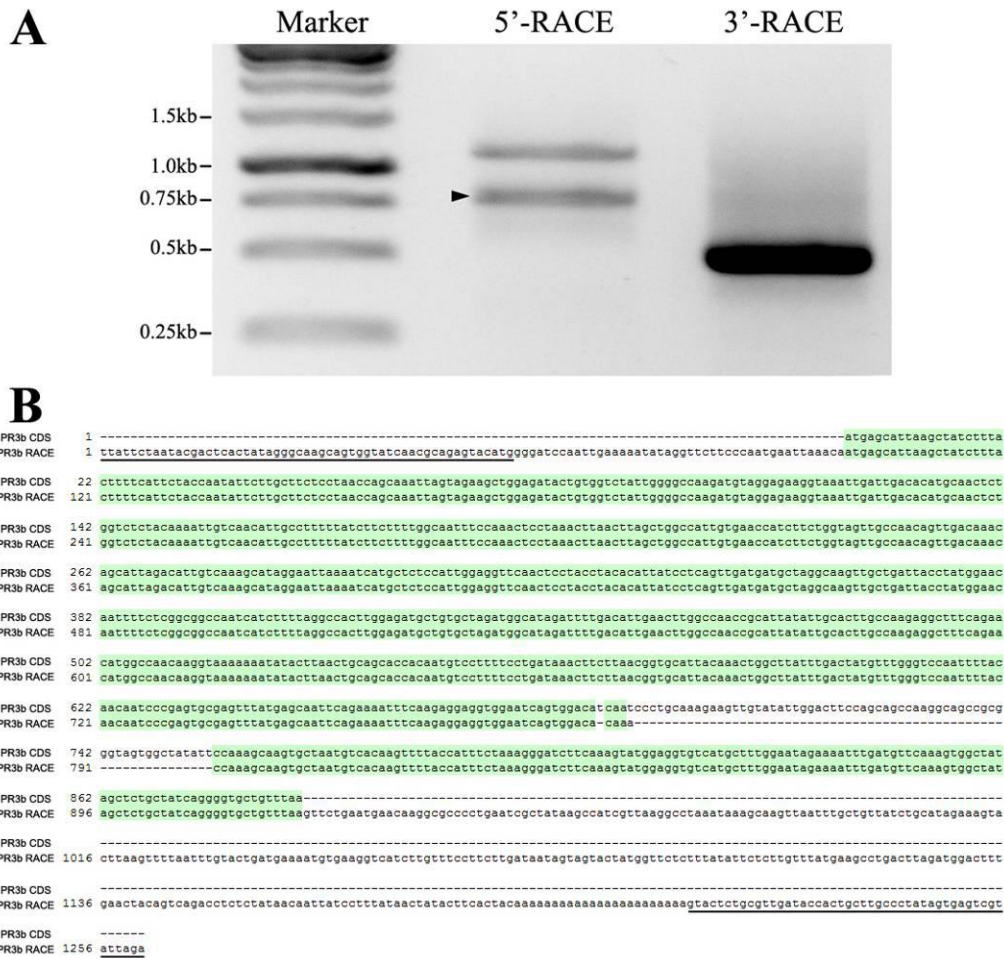

**Fig. S3.** Rapid amplification of cDNA ends (RACE) of alternatively spliced *PR3b*. (A) Electrophoresis of RACE PCR products. Triangle in the lane of 5'-RACE indicates the band containing target RACE PCR product. (B) Sequence alignment of spliced *PR3b* obtained by RACE PCR and the coding sequence of native *PR3b*. Underlined sequences indicate amplified adapters in the universal primers of SMARTer RACE kit.

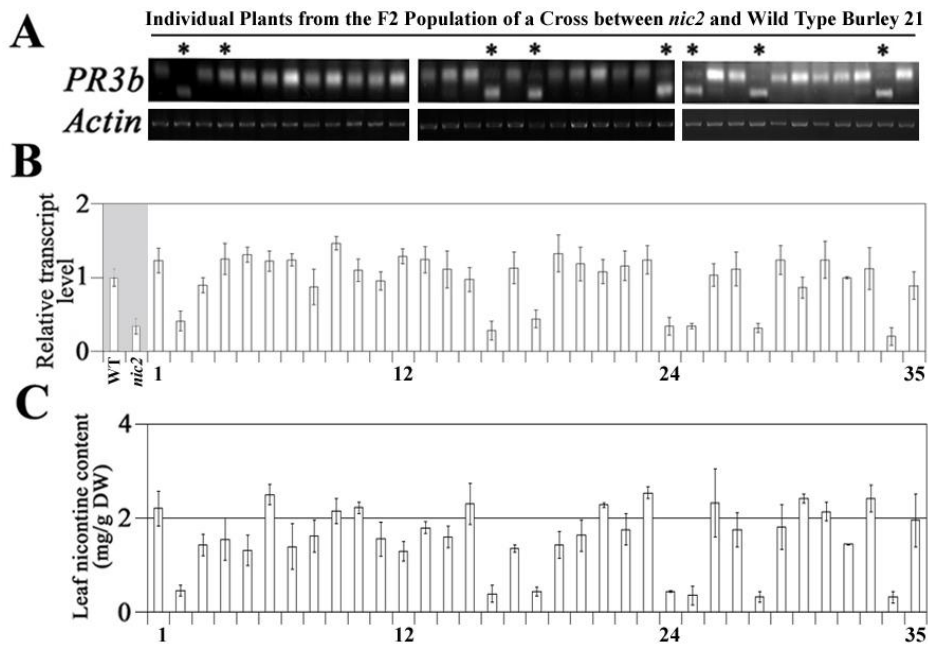

**Fig. S4.** Alternative splicing of *PR3b* in the F2 individuals of a cross between *nic2* and wild type Burley 21. (A) Alternative splicing of *PR3b* in individual F2 plants. (B) Transcript levels of *PMT1* in the roots of individual F2 plants. Transcript level of *PMT1* in the roots of wild type Burley 21 was set as “1”. *Actin* was used as an internal control. (C) Leaf nicotine content of individual F2 plants. Shown values are means of three technical replicates. Error bar, mean  $\pm$  SD.

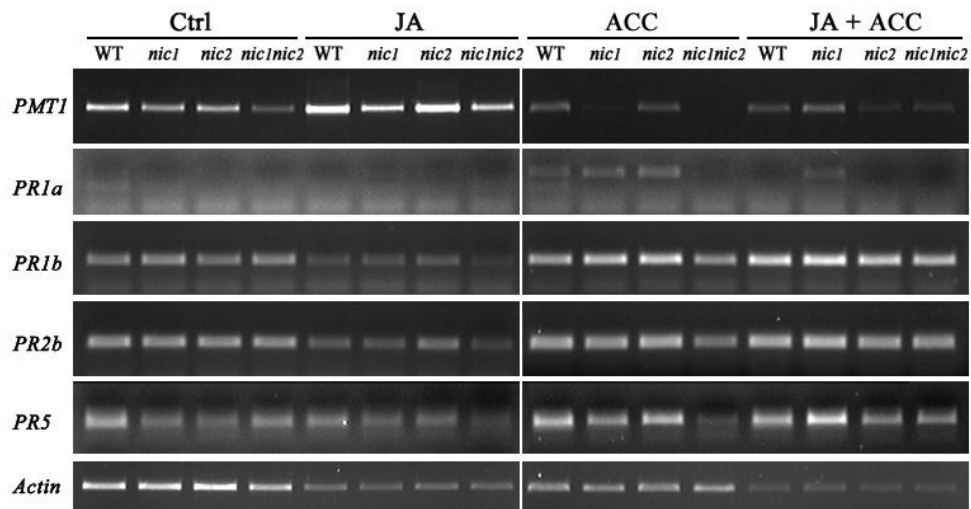

**Fig. S5.** Phytohormone-induced transcription patterns of PR protein genes. The transcription patterns of PR protein genes in wild type (WT) and low-nicotine mutants (*nic1*, *nic2*, and *nic1nic2*) were analyzed following treatment with JA, ACC, or the combination of JA and ACC (JA+ACC). Shown are representative results of three independent replicates. Ctrl indicates the untreated controls. *Actin* was used as an internal control.
